# Supplementary material
Source: publisher figshare collection journal article supplement (https://tandf.figshare.com/ndownloader/files/13216217)
Supplement: Supplementary file 1 [file 13216217]

# Interview guide

- Could you start by describing your workday?
- Could you elaborate on how your hearing loss affects you at work?
- Can you tell me what you do to take care of yourself if the working situation becomes tiresome?
- Could you tell me how you carry out conversations with multiple participants at your work place? How does it work for you?
- How is the lunch situation in your company? How do you participate in social gatherings?
- When/if you inform colleagues about your hearing loss, what do you tell them?
- (If not: why have you chosen not to inform about your hearing loss?)
- In your dialogue with your manager, in what way is your hearing condition an issue?
- How would the ideal working situation look like in the position you hold today?
- What kind of assistance would you have liked to have to obtain good working conditions?
- What kind of role should your employer have in such a process?
- How important is it for you to keep on working?
